# Supplementary material for: Prediction across healthcare settings: a case study in predicting emergency department disposition
Source: PubMed Central journal article supplement (PMC8674364; doi:10.1038/s41746-021-00537-x), 2021-12-15
Supplement: 41746_2021_537_MOESM1_ESM.pdf [file 41746_2021_537_MOESM1_ESM.pdf]

# Supplementary Materials

## Supplementary Note 1

```
getTopFeaturesUsingXGBoost <- function(training.data, num_rounds = 5, sample_size = 1000,
params)
{
  selected_features = c()
  for (i in 1:num_rounds) {
    # sub sample the training set
    idxs = sample(1:nrow(training.data),sample_size,replace=F)
    training <- convertToXGBoostMatrix(training.data[idxs,])
    # build the model and find which were the top features used
    xgb.fit.small <- xgb.train (params = params, data = training, nrounds = 10, watchlist =
list(train=training), print_every_n = 10, early_stopping_rounds = 10, maximize = F , eval_metric =
"error", verbose=0)
    selected_features = c(selected_features, getBestParams(xgb.fit.small, count = 20))
  }
  selected_features = unique(selected_features)
  return(selected_features)
}
```

```
buildAndValidateXGBoost <- function(training, testing, params)
{
  # find the nrounds parameter (equivalent to number of trees to grows in Random Forest)
  xgbcv <- xgb.cv( params = params, data = training, nrounds = 100, nfold = 5, showsd = T, stratified = T,
print_every_n = 10, early_stopping_rounds = 40, maximize = F)
  best_nrounds = xgbcv$best_iteration;
  xgb.fit <- xgb.train (params = params, data = training, nrounds = best_nrounds, watchlist =
list(train=training, val=testing), print_every_n = 10, early_stopping_rounds = 10,
maximize = F , eval_metric = "error")

  # validate performance on the testing set
  xgb.pred <- predict (xgb.fit, testing)
  true_outcome = getinfo(testing, 'label')
  xgb.roc.res = roc(true_outcome, xgb.pred)

  return(list(training, testing, xgb.fit, xgb.pred))
}
```

TRAIN\_SIZE = 0.7

```
params = list(booster = "gbtree", objective = "binary:logistic", eta=0.3, gamma=0, max_depth=6,
min_child_weight=1, subsample=1, colsample_bytree=1)
```

# Select top-20 features

```
selected_features.ssh = getTopFeaturesUsingXGBoost(site_data.ssh[['training']])
selected_features.bch = getTopFeaturesUsingXGBoost(site_data.bch[['training']])
selected_features.chla = getTopFeaturesUsingXGBoost(site_data.chla[['training']])
```

# re-build the model using the best selected features

```
xgboost.ssh = buildAndValidateXGBoost(site_data.ssh[['training']], c(selected_features.ssh, 'isCase'),
                                     site_data.ssh[['testing']], c(selected_features.ssh, 'isCase'), params)
xgboost.bch = buildAndValidateXGBoost(site_data.bch[['training']], c(selected_features.bch, 'isCase'),
                                     site_data.bch[['testing']], c(selected_features.bch, 'isCase'), params)
xgboost.chla = buildAndValidateXGBoost(site_data.chla[['training']], c(selected_features.chla, 'isCase'),
                                     site_data.chla[['testing']], c(selected_features.chla, 'isCase'), params)
```

**Supplementary Table 1** - Top risk factors associated with hospitalization for the BCH site.

| <b>Feature</b>                          | <b>Cases</b> | <b>Controls</b> | <b>OR</b> | <b>95% CI</b>     |
|-----------------------------------------|--------------|-----------------|-----------|-------------------|
| Piperacillin-tazobactam                 | 109          | 1               | 466.1     | [65.07 - 3339.31] |
| Admission ratio > 50%                   | 2,272        | 191             | 50.9      | [43.84 - 59.03]   |
| Drugs count >= 6                        | 50           | 5               | 42.8      | [17.05 - 107.25]  |
| Arrival mode to ED by Air transport     | 74           | 9               | 35.2      | [17.6 - 70.25]    |
| Electrolytes (Na, K, Cl), Whole Blood   | 62           | 8               | 33.1      | [15.87 - 69.22]   |
| Resp rate documented >= 5 times         | 435          | 60              | 31.0      | [23.66 - 40.64]   |
| Heart rate documented >= 5 times        | 469          | 68              | 29.5      | [22.86 - 38.06]   |
| Lactic Acid, Whole Blood                | 527          | 78              | 28.9      | [22.76 - 36.67]   |
| Medication by intravenous drip          | 120          | 18              | 28.5      | [17.37 - 46.8]    |
| Dextrose 5% with 0.9% NaCl 1,000 mL     | 66           | 10              | 28.2      | [14.51 - 54.9]    |
| Blood Gas, Venous                       | 1,429        | 244             | 25.0      | [21.84 - 28.72]   |
| Differential, Manual                    | 57           | 10              | 24.4      | [12.45 - 47.74]   |
| Dextrose 5% with 0.9% NaCl 500 mL       | 157          | 28              | 24.0      | [16.03 - 35.86]   |
| Children's hosp early warning score >=5 | 448          | 89              | 21.5      | [17.13 - 27.04]   |
| WB Profile - IonCa, Na, K, Cl, Glu      | 360          | 72              | 21.4      | [16.59 - 27.56]   |
| Calcium, Ionized                        | 77           | 16              | 20.6      | [12.01 - 35.27]   |
| CT-Head                                 | 61           | 13              | 20.1      | [11.02 - 36.53]   |
| Pancreatitis                            | 51           | 11              | 19.8      | [10.33 - 38.05]   |
| Bench ABORh <sup>¥</sup>                | 64           | 15              | 18.2      | [10.4 - 32.02]    |

¥ Bench ABORh - cross matching for blood transfusions.

**Supplementary Table 2** - Top risk factors associated with hospitalization for the CHLA site.

| Feature                           | Cases | Controls | Odds Ratio | 95% CI          |
|-----------------------------------|-------|----------|------------|-----------------|
| ED.ROOM                           | 51    | 1        | 593.0      | [81.9 - 4292.2] |
| Pain score (count=10)             | 335   | 20       | 194.8      | [124 - 306]     |
| Triage score = 1                  | 181   | 13       | 161.9      | [92.2 - 284.4]  |
| (Stat)XR Chest AP<br>PORTABL      | 49    | 7        | 81.4       | [36.9 - 179.8]  |
| Pain score (count=8)              | 90    | 16       | 65.4       | [38.4 - 111.4]  |
| (Stat)Chest AP<br>PORTABLE X      | 56    | 10       | 65.1       | [33.2 - 127.7]  |
| Pain score (count=9)              | 64    | 13       | 57.2       | [31.5 - 104]    |
| Pain score (count=7)              | 98    | 22       | 51.8       | [32.6 - 82.3]   |
| (Stat)CSF Glucose                 | 60    | 22       | 31.7       | [19.4 - 51.7]   |
| (Stat)CSF Protein                 | 60    | 22       | 31.7       | [19.4 - 51.7]   |
| (Stat)CSF Culture                 | 62    | 23       | 31.3       | [19.4 - 50.6]   |
| (Stat)CSF Cell Count              | 61    | 23       | 30.8       | [19.1 - 49.9]   |
| (Stat)Culture Blood<br>Aerobic #1 | 45    | 21       | 24.9       | [14.8 - 41.9]   |
| Pain score (count=6)              | 146   | 69       | 24.6       | [18.5 - 32.8]   |
| Labs (count=10)                   | 96    | 48       | 23.3       | [16.4 - 32.9]   |
| (Stat)Anaerobic Blood<br>Culture  | 41    | 23       | 20.7       | [12.4 - 34.6]   |

|                                   |     |     |      |               |
|-----------------------------------|-----|-----|------|---------------|
| (Stat)Blood Culture               | 200 | 114 | 20.4 | [16.2 - 25.7] |
| (Stat)Blood Bank<br>Collection Ty | 206 | 119 | 20.1 | [16 - 25.3]   |
| (Stat)Type & Screen               | 201 | 117 | 20.0 | [15.9 - 25.1] |

**Supplementary Table 3** - Top risk factors associated with hospitalization for the SSH site.

| <b>Feature</b>                                   | <b>Cases</b> | <b>Controls</b> | <b>OR</b> | <b>95% CI</b>   |
|--------------------------------------------------|--------------|-----------------|-----------|-----------------|
| CEFEPIME IVPB                                    | 96           | -               | NA        | NA              |
| heparin (porcine)                                | 52           | -               | NA        | NA              |
| PANTOPRAZOLE INFUSION                            | 60           | 1               | 168.9     | [23.4 - 1218.6] |
| CPAP/BIPAP (NIPPV) -                             | 99           | 2               | 139.3     | [34.4 - 564.9]  |
| Cardiac Catheterization                          | 56           | 2               | 78.8      | [19.2 - 323]    |
| etomidate (AMIDATE)                              | 52           | 2               | 73.2      | [17.8 - 300.5]  |
| Arterial Blood Gas with Electrolytes             | 169          | 9               | 52.8      | [27 - 103.4]    |
| propofol (DIPRIVAN) infusion - ADS Override Pull | 71           | 4               | 50.0      | [18.2 - 136.8]  |
| heparin                                          | 49           | 3               | 46.0      | [14.3 - 147.5]  |
| HEPARIN SODIUM (PORCINE)                         | 59           | 4               | 41.5      | [15.1 - 114.3]  |
| count_TransfusionAdministration = 1              | 49           | 5               | 27.6      | [11 - 69.2]     |
| BB Previous History Check                        | 97           | 10              | 27.3      | [14.2 - 52.4]   |
| Respiratory.distress                             | 83           | 9               | 26.0      | [13 - 51.6]     |
| count_BloodBank = 1                              | 70           | 8               | 24.6      | [11.8 - 51.2]   |
| VANCOMYCIN                                       | 96           | 11              | 24.6      | [13.2 - 45.8]   |
| Blood Culture, Peripheral #2                     | 378          | 45              | 23.6      | [17.3 - 32.2]   |
| Blood Culture, Peripheral #1                     | 380          | 47              | 22.8      | [16.8 - 30.8]   |
| midazolam (VERSED)                               | 104          | 13              | 22.5      | [12.6 - 40.1]   |
| Cellavision Differential                         | 67           | 9               | 21.0      | [10.4 - 42]     |
| admission_ratio > 50%                            | 3332         | 452             | 20.7      | [18.8 - 22.9]   |

**Supplementary Table 4** - Top 20 features identified by each site’s model, ordered with features common to all sites listed first.

| <b>BCH</b>                   | <b>CHLA</b>                 | <b>SSH</b>                          |
|------------------------------|-----------------------------|-------------------------------------|
| Admission ratio              | Admission ratio             | Admission ratio                     |
| Age group                    | Age group                   | Age group                           |
| Triage score                 | Triage score                | Triage score                        |
| ED room type                 | ED room type                | ED room type                        |
| Number of labs ordered       | Number of labs ordered      | Number of labs ordered              |
| Race                         | Race                        |                                     |
| Prior admissions (count)     | Prior admissions (count)    | Prior admissions (count)            |
| Venous blood gasses          | Venous blood gasses         |                                     |
| CBC with differential        | CBC with differential       |                                     |
| Heart rate (times taken)     |                             | Heart rate (times taken)            |
| Heart rate (maximal value)   |                             | Heart rate (maximal value)          |
| IV placed                    |                             | IV placed                           |
| ED chief complaint           |                             | ED chief complaint                  |
| <b>BCH unique</b>            | <b>CHLA unique</b>          | <b>SSH unique</b>                   |
| Arrival mode to the ED       | Pain score (times taken)    | Teams involved (count)              |
| Medical problems (count of)  | Total prior visits          | Comprehensive metabolic panel taken |
| Respiratory rate (max value) | Urinalysis                  | Medical problem = ‘other’           |
| Patient address (state)      | Oxygen saturation (SD)      | “Registered nurse”                  |
| Month in year                | Oxygen saturation (min)     | Total number of prior visits        |
| Heart rate (SD)              | Time until first medication | Lactic acid, taken                  |
| Miles traveled               | Pain score (max)            | “Physician Assistant”               |
|                              | Oxygen saturation (mean)    | Chest X-Ray                         |
|                              | Address (Zip code)          | Time until first ECG                |
|                              | ED Team                     | Number of medications given         |

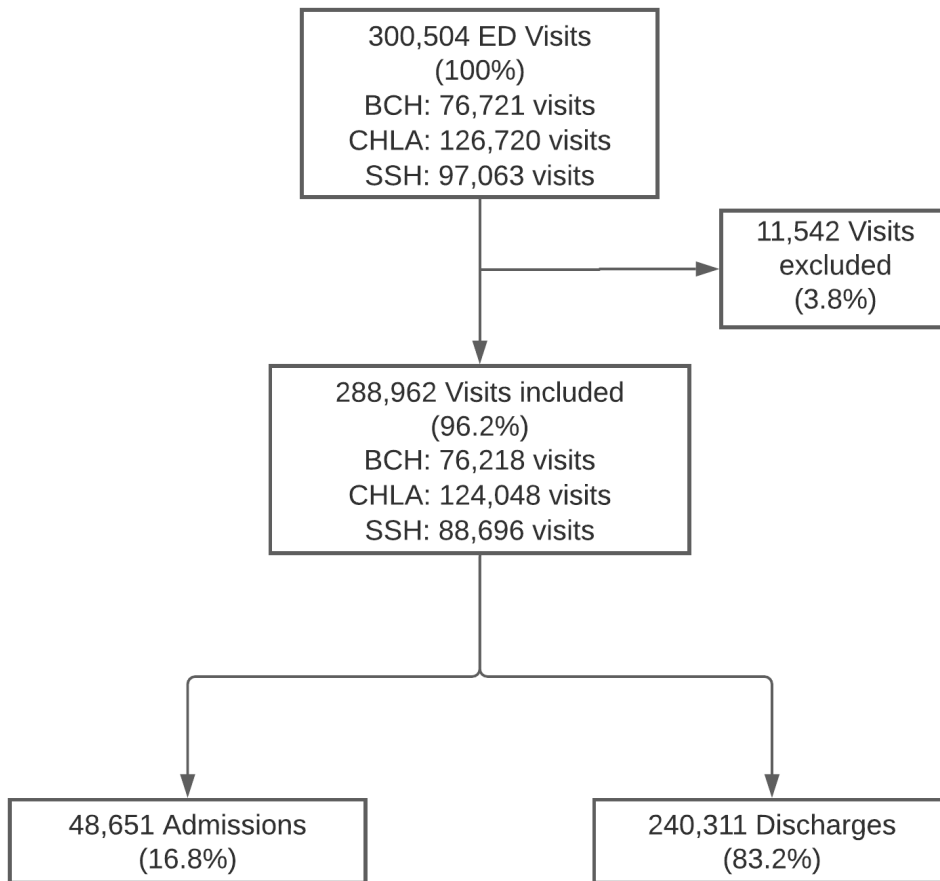

**Supplementary Figure 1** - Number of visits included and excluded in the study.



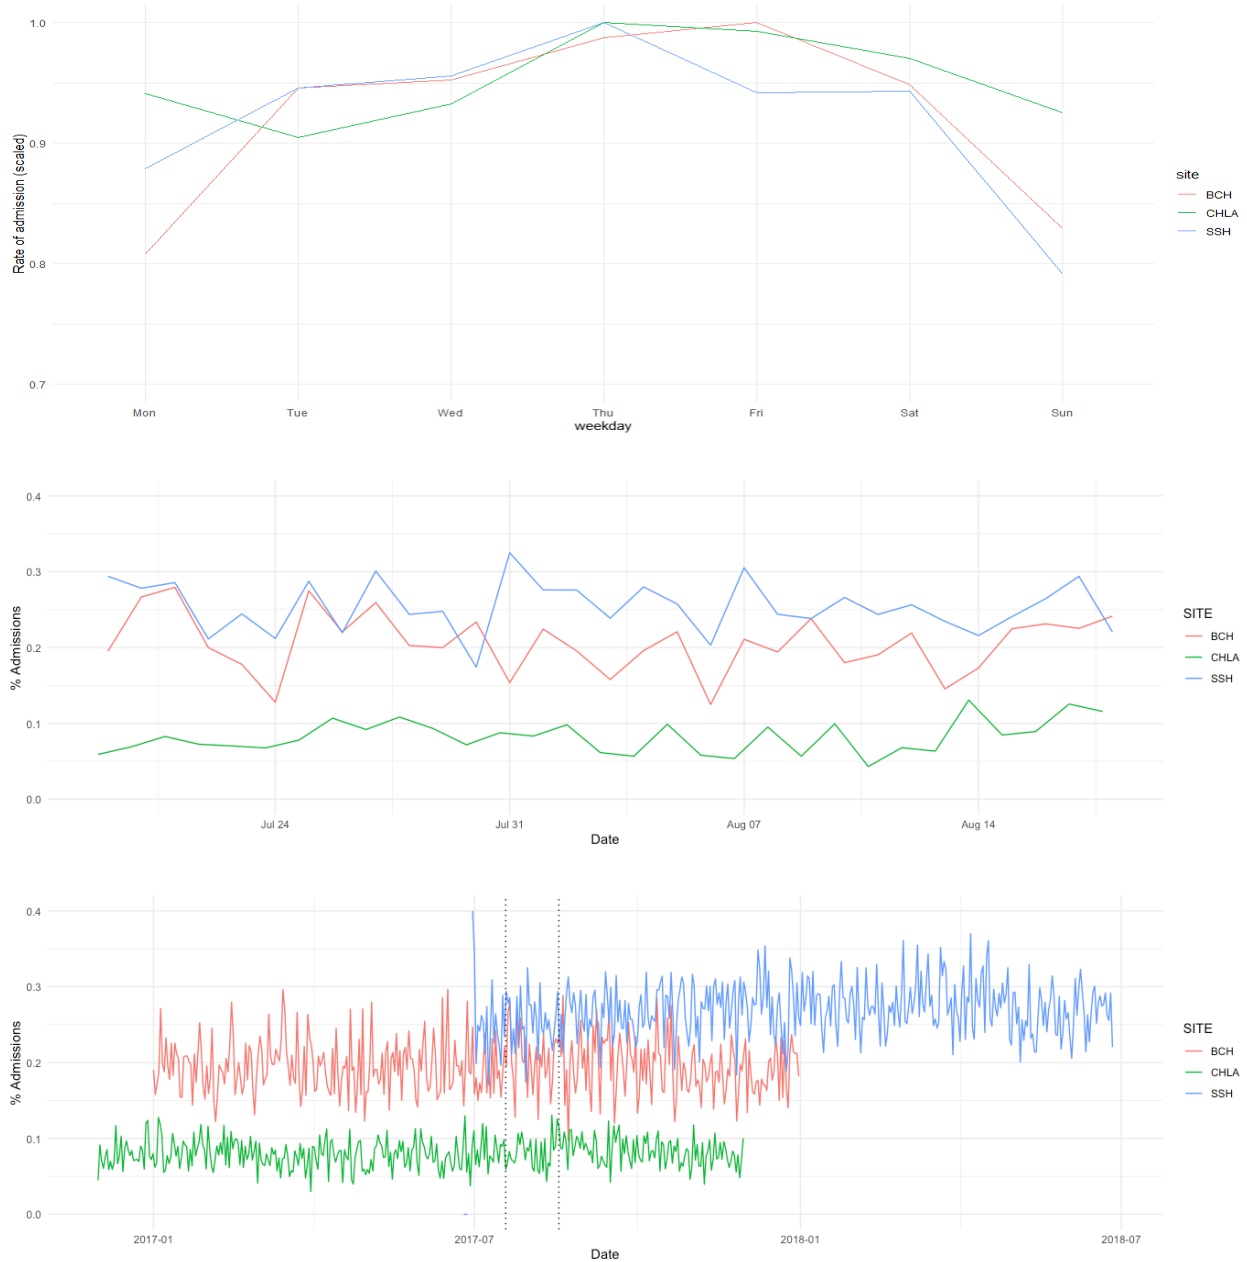

**Supplementary Figure 2** - Rate of admission over time. Top: rate of admission by weekday, scaled as percent from the maximal daily admission rate. During the weekends the admission rate was lower at all sites by 1-2% ( $p < 0.05$ ). The middle plot is an enlargement of one month of the study (delimited by dotted lines in the bottom plot). Overall, the standard deviation of the admission rate across the sites ranged from 1.9% to 5.6%

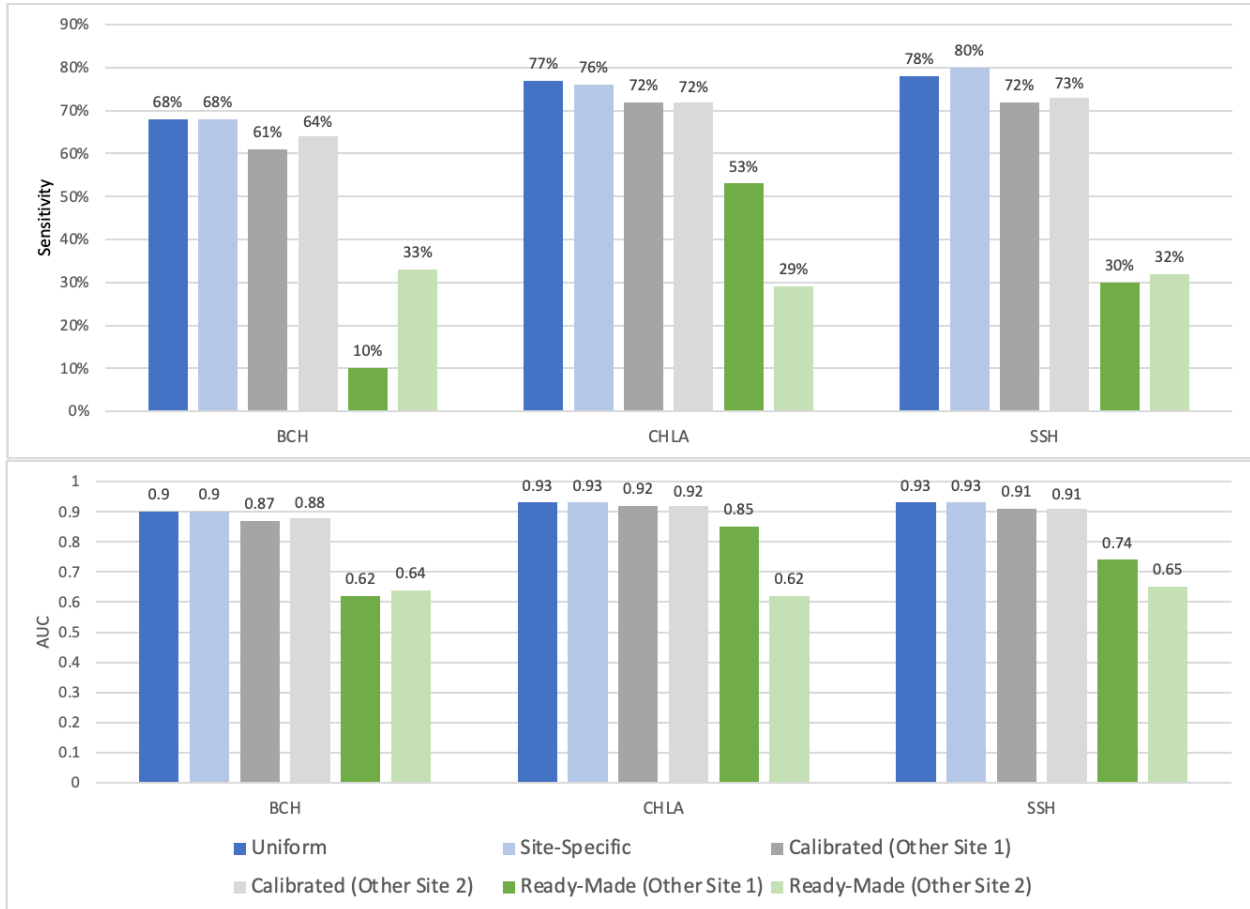

**Supplementary Figure 3** - Comparison of model performance for the different modelling approaches. Top: the sensitivity of each model with a 90% specificity cutoff. Bottom: the overall AUC for each model-type and for each site.
